# Supplementary material for: A microRNA code for prostate cancer metastasis
Source: PubMed Central journal article supplement — Oncogene. 2015 Jun 15;35(9):1180–92. doi: 10.1038/onc.2015.176 (PMC4803473; doi:10.1038/onc.2015.176), 2015-06-15
Supplement: onc2015176x1.pdf [file onc2015176x1.pdf]

Table S1: Formalin fixed and paraffin embedded tissues: miR-15/miR16 and miR-21 level evaluation by real time PCR

|                                                                                   |      | miR-15 | miR-16 | miR-21 | pTNM                |
|-----------------------------------------------------------------------------------|------|--------|--------|--------|---------------------|
| Pool normal tissues (reference)                                                   |      | 1      | 1      | 1      |                     |
| Patients with negative follow up after ten years                                  | T1   |        |        |        | pT3a                |
|                                                                                   | T2   |        |        |        | pT2c                |
|                                                                                   | T3   |        |        |        | pT2b                |
|                                                                                   | T4   |        |        |        | pT2a                |
|                                                                                   | T5   |        |        |        | pT2b                |
|                                                                                   | T6   |        |        |        | pT3a                |
|                                                                                   | T7   |        |        |        | pT2b                |
| Patients with documented clinical evidences of metastases within three-five years | T8   |        |        |        | NA TURP material    |
|                                                                                   | T9   |        |        |        | pT3b                |
|                                                                                   | T10  |        |        |        | pT3a                |
|                                                                                   | T11  |        |        |        | pT3b                |
|                                                                                   | T12  |        |        |        | pT3b                |
|                                                                                   | T13  |        |        |        | NA Biopsy gleason 9 |
|                                                                                   | T14  |        |        |        | pT3b                |
|                                                                                   | T15  |        |        |        | pT3a                |
| Linfonodal Metastases                                                             |      |        |        |        |                     |
|                                                                                   | ML1  |        |        |        |                     |
|                                                                                   | ML2  |        |        |        |                     |
| Bone marrow Metastases                                                            |      |        |        |        |                     |
|                                                                                   | MO1  |        |        |        |                     |
|                                                                                   | MO2  |        |        |        |                     |
|                                                                                   | MO3  |        |        |        |                     |
|                                                                                   | MO4  |        |        |        |                     |
|                                                                                   | MO5  |        |        |        |                     |
|                                                                                   | MO6  |        |        |        |                     |
|                                                                                   | MO7  |        |        |        |                     |
|                                                                                   | MO8  |        |        |        |                     |
|                                                                                   | MO9  |        |        |        |                     |
|                                                                                   | MO10 |        |        |        |                     |
|                                                                                   | MO11 |        |        |        |                     |
|                                                                                   | MO12 |        |        |        |                     |
|                                                                                   | MO13 |        |        |        |                     |
|                                                                                   | MO14 |        |        |        |                     |
|                                                                                   | MO15 |        |        |        |                     |
|                                                                                   | MO16 |        |        |        |                     |
|                                                                                   | MO17 |        |        |        |                     |
|                                                                                   | MO18 |        |        |        |                     |
|                                                                                   | MO19 |        |        |        |                     |
|                                                                                   | MO20 |        |        |        |                     |

(miR-15/miR-16 and miR-21 have been considered down-regulated and up-regulated for values < 0.5 and >1.3 respectively)

<0.5 >1.3
