# Supplementary figures and images for: A microRNA code for prostate cancer metastasis
Source: PubMed Central journal article supplement — Oncogene. 2015 Jun 15;35(9):1180–92. doi: 10.1038/onc.2015.176 (PMC4803473; doi:10.1038/onc.2015.176), 2015-06-15

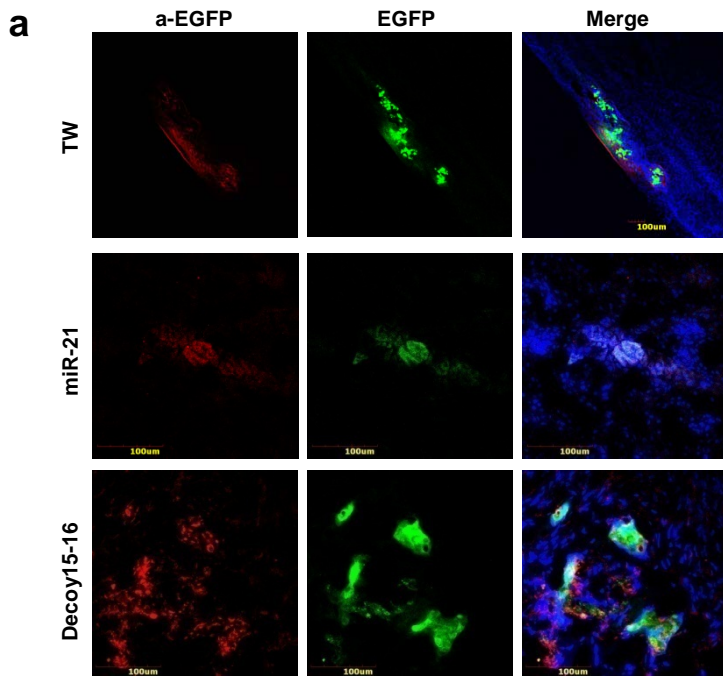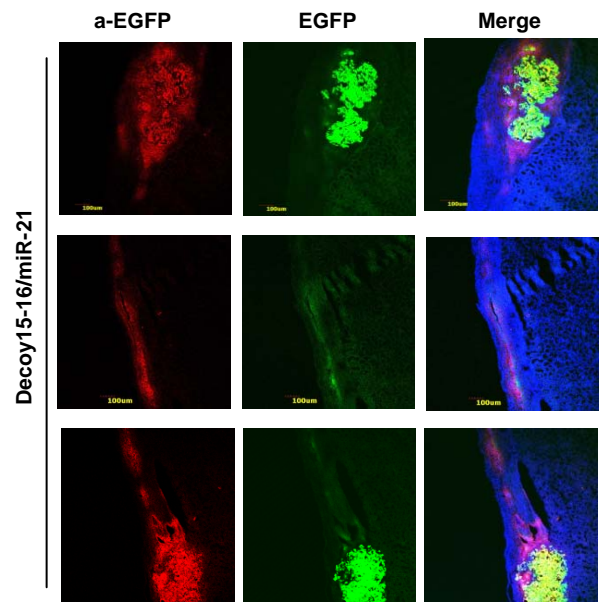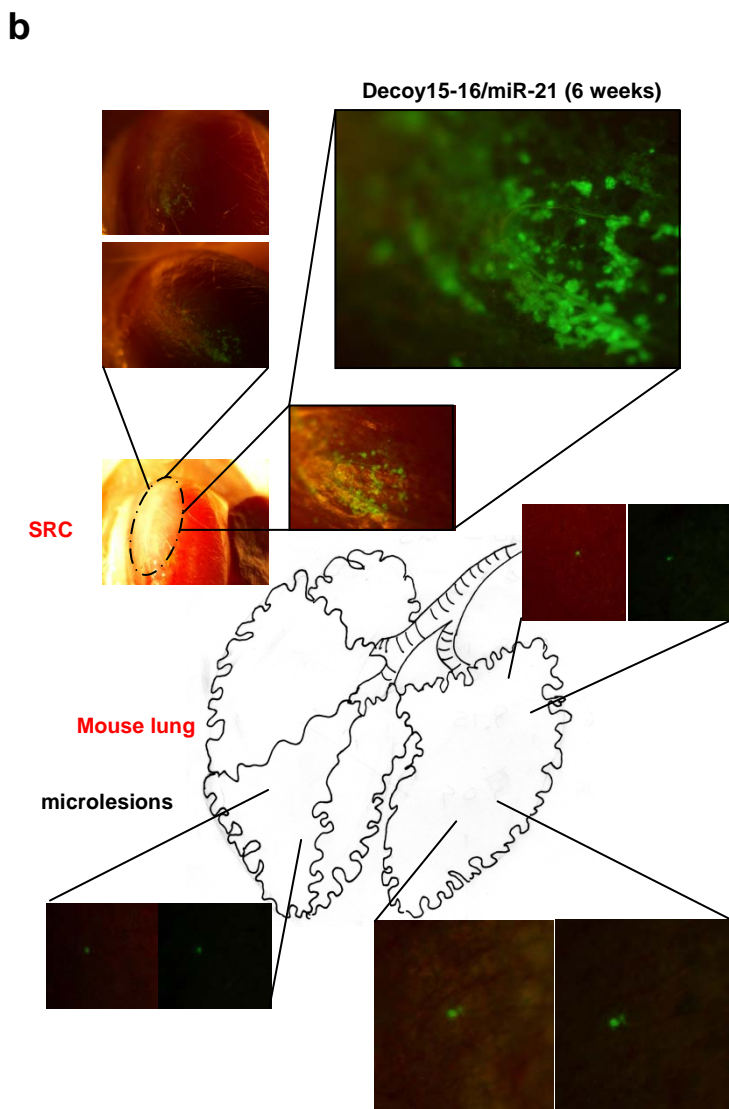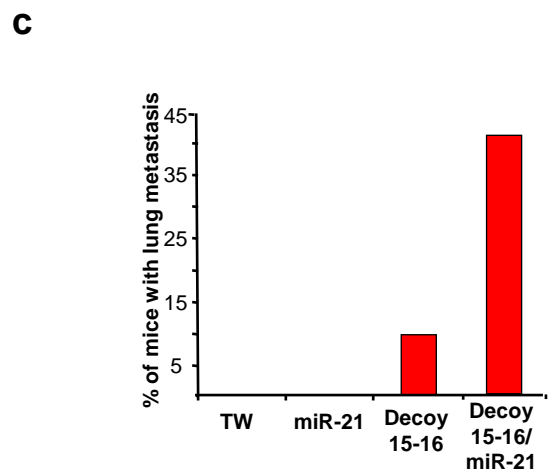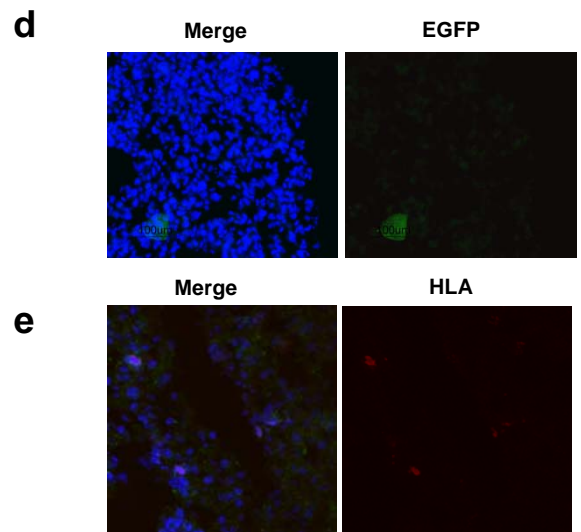

Supplementary Fig. 8

Supplement: onc2015176x10.pdf [file onc2015176x10.pdf]

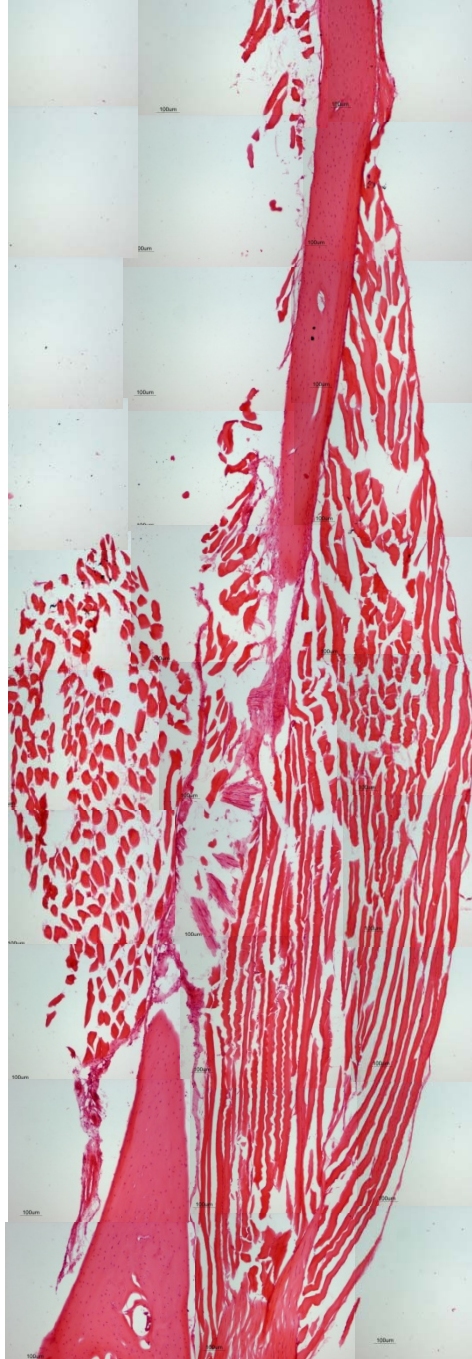

**Supplementary Fig. 9**

Supplement: onc2015176x11.pdf [file onc2015176x11.pdf]

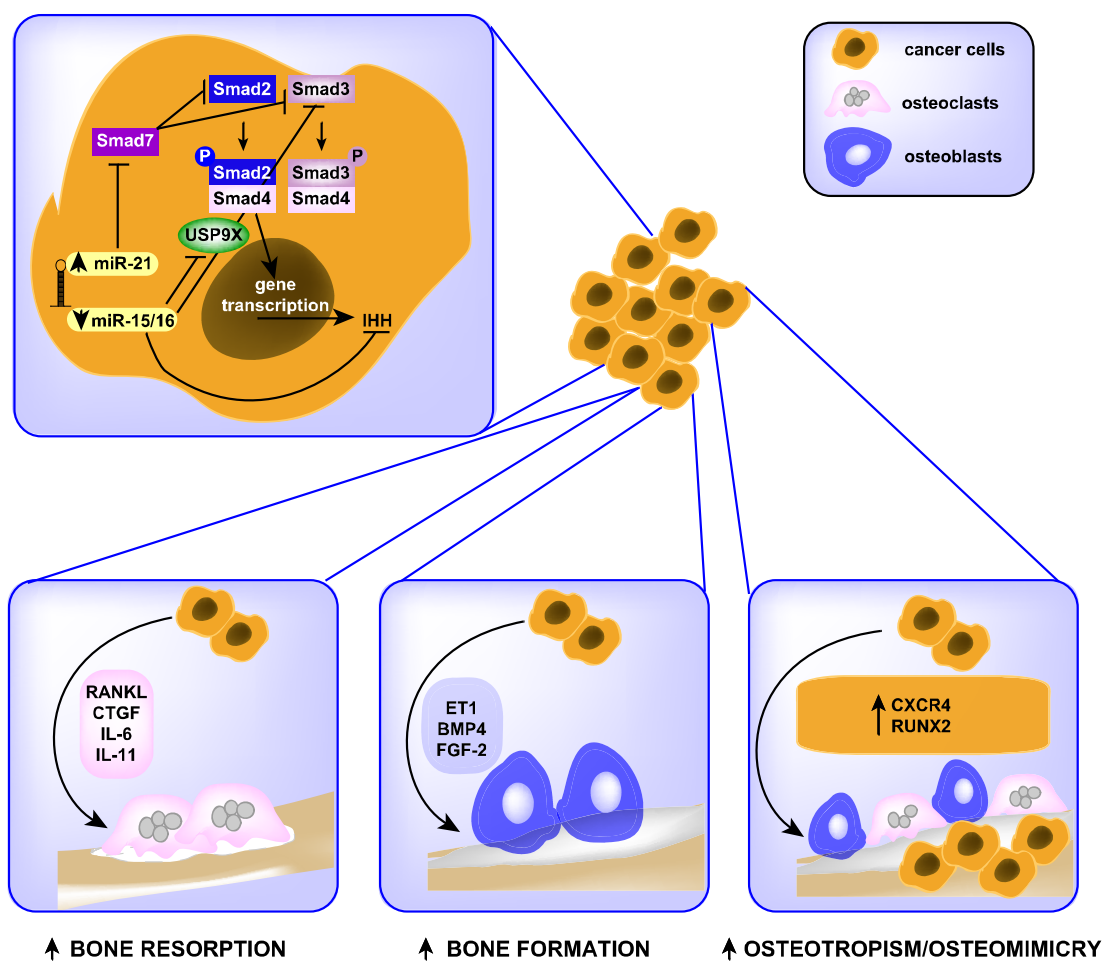

Supplementary Fig. 10

Supplement: onc2015176x12.pdf [file onc2015176x12.pdf]

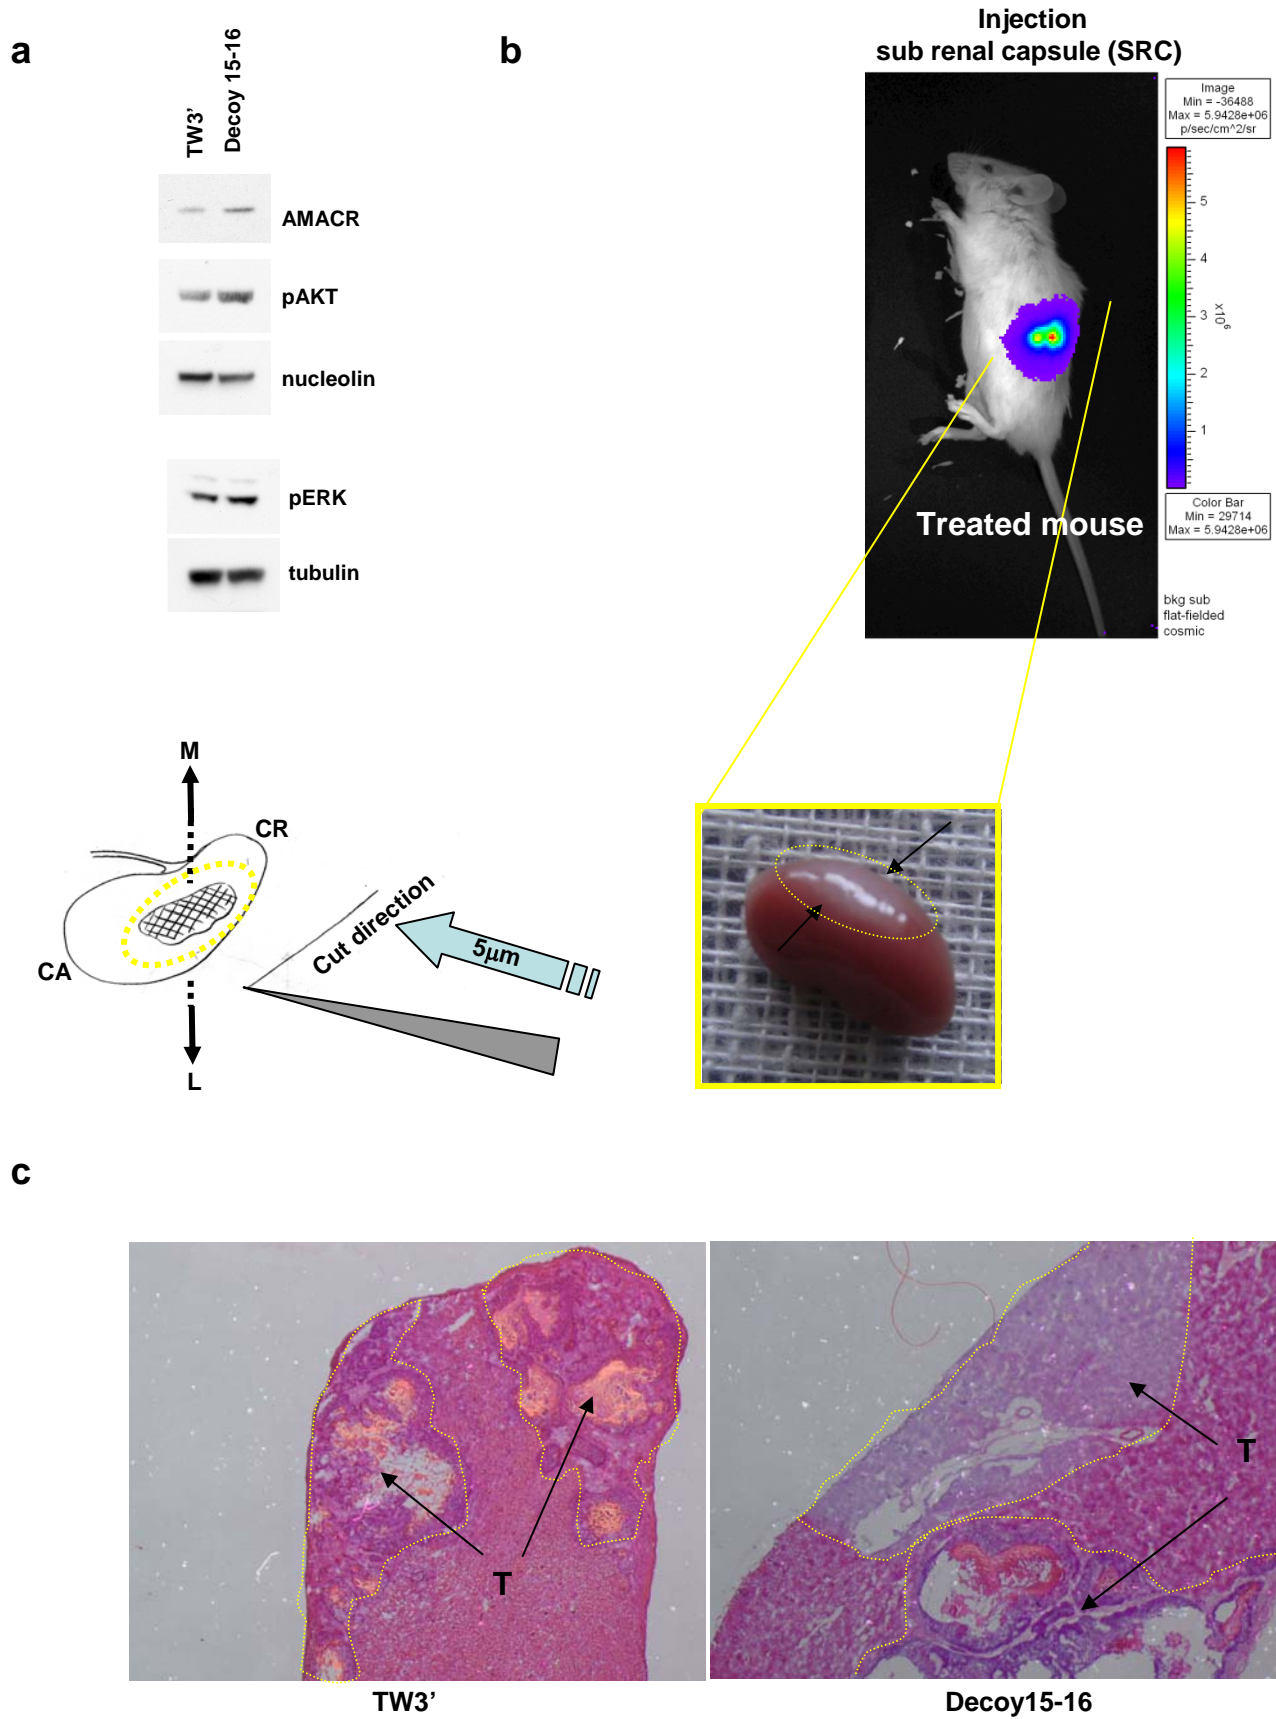

Supplementary Fig. 1

Supplement: onc2015176x3.pdf [file onc2015176x3.pdf]

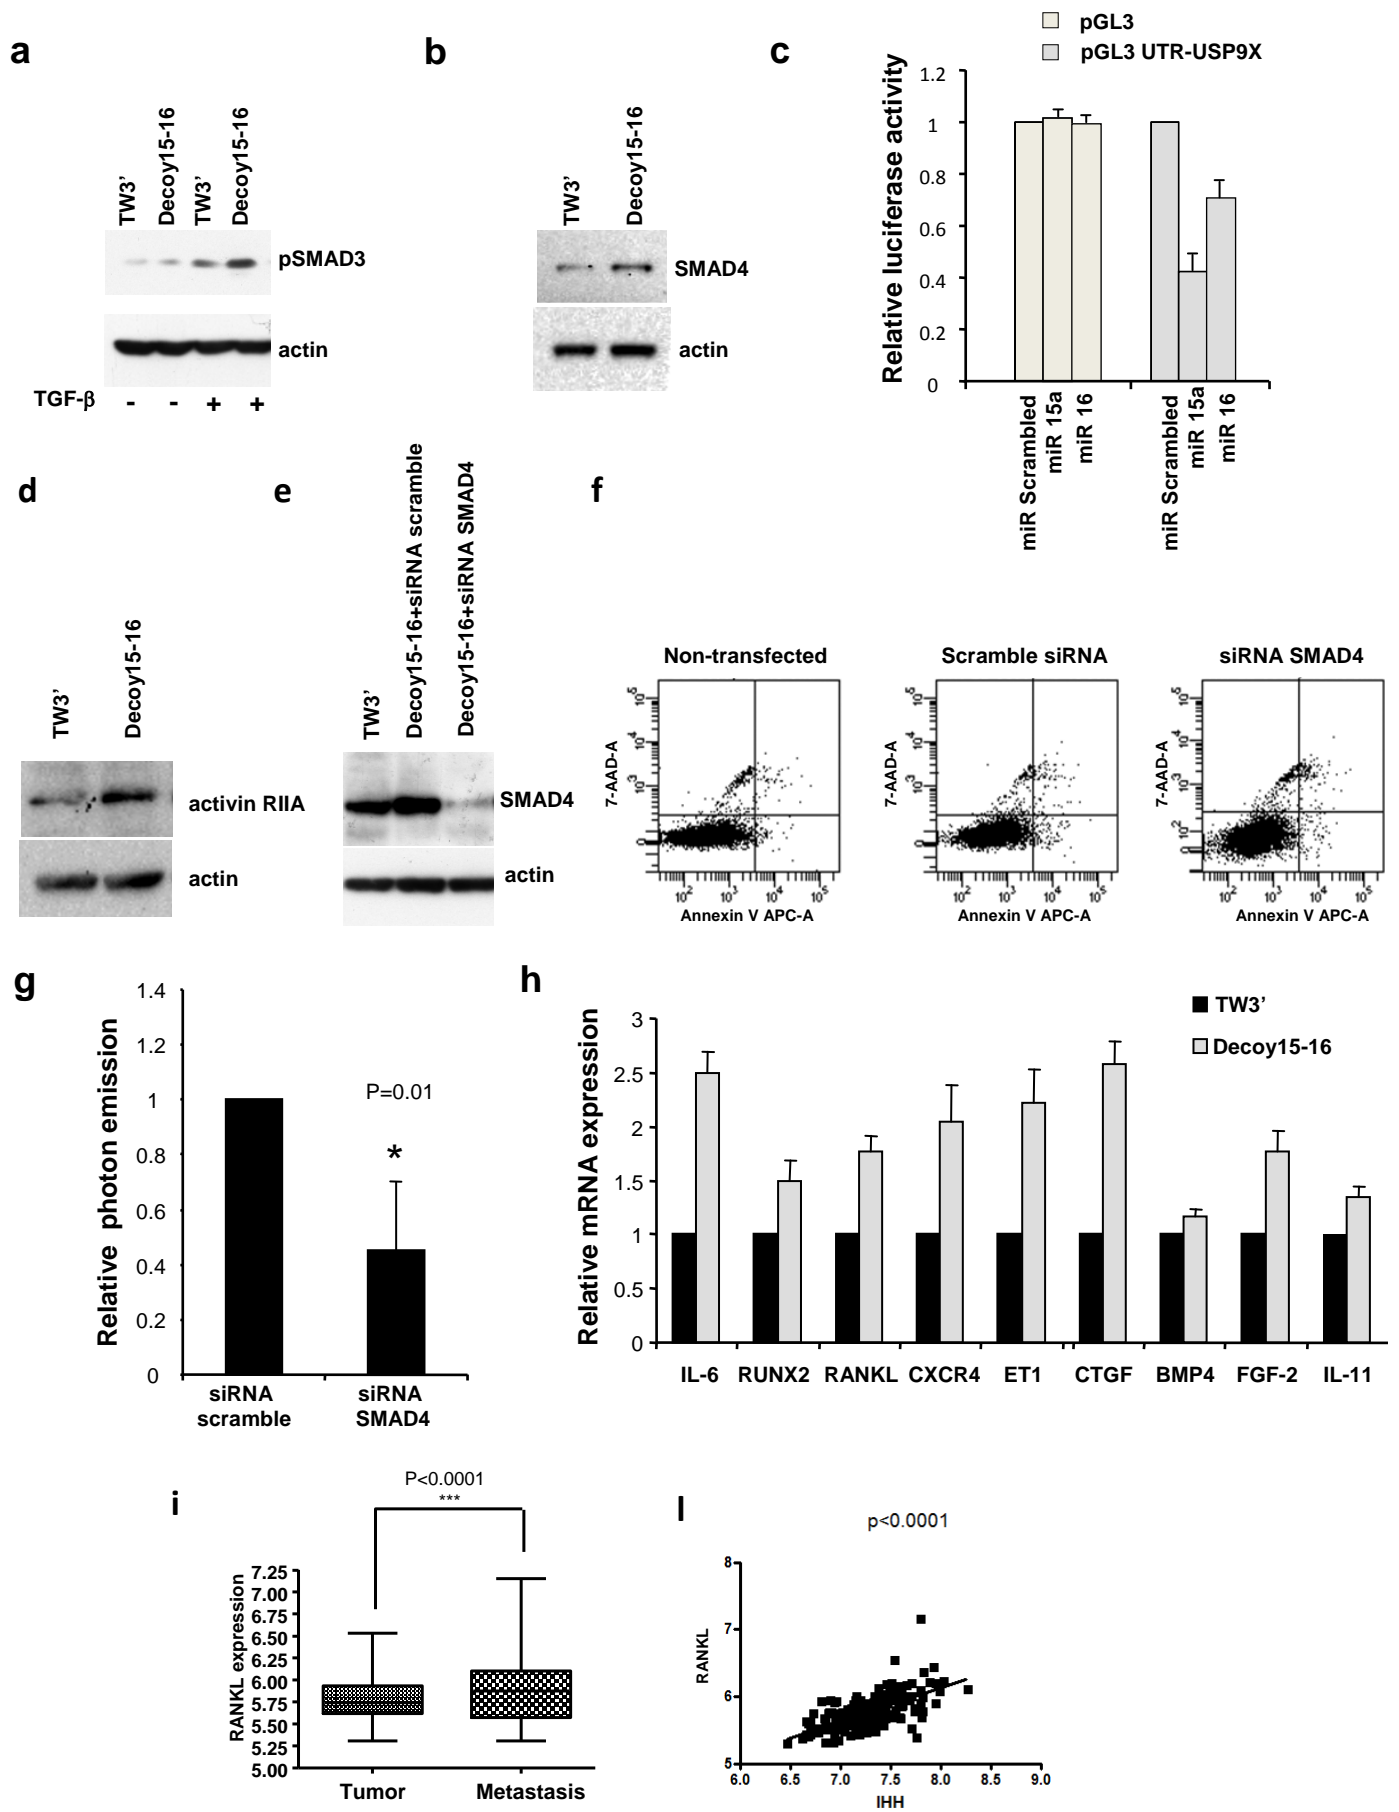

Supplementary Fig. 3

Supplement: onc2015176x5.pdf [file onc2015176x5.pdf]

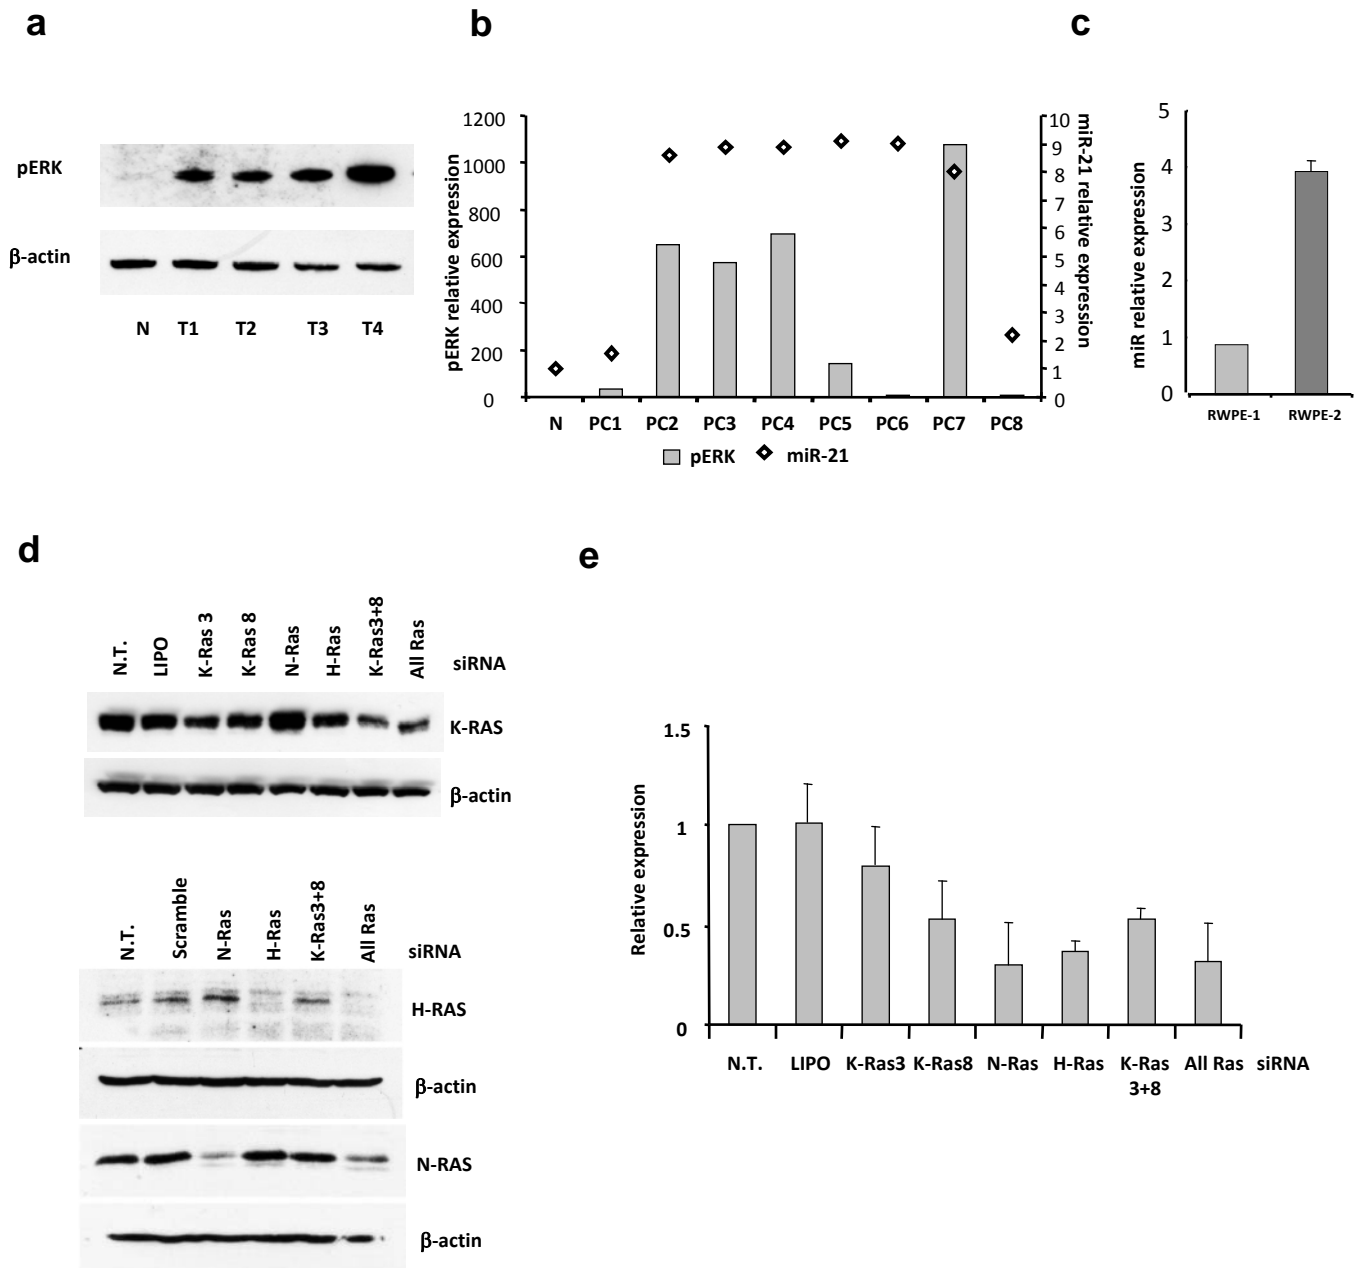

Supplementary Fig. 4

Supplement: onc2015176x6.pdf [file onc2015176x6.pdf]

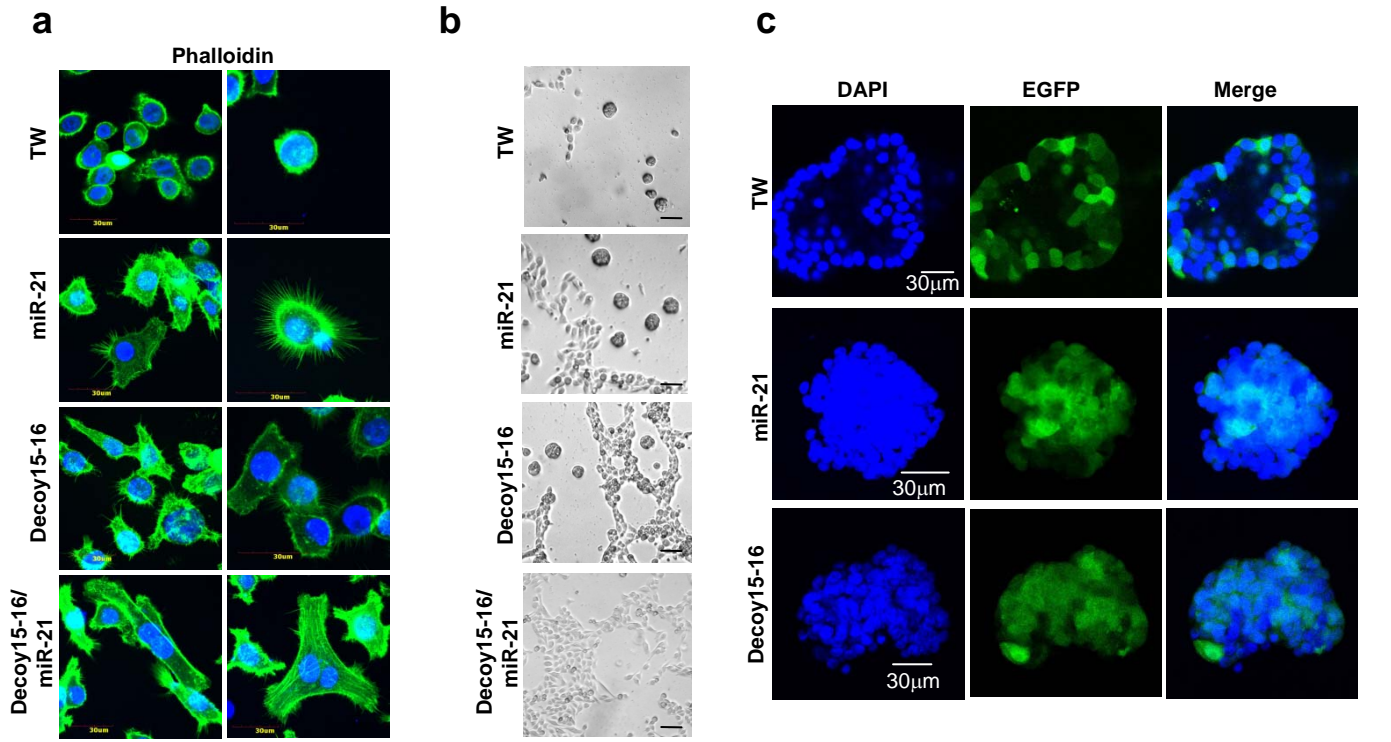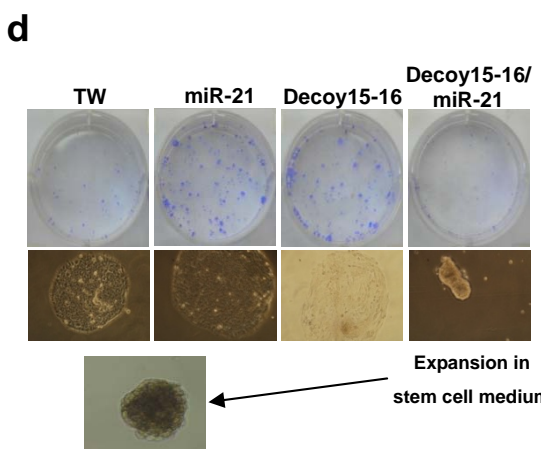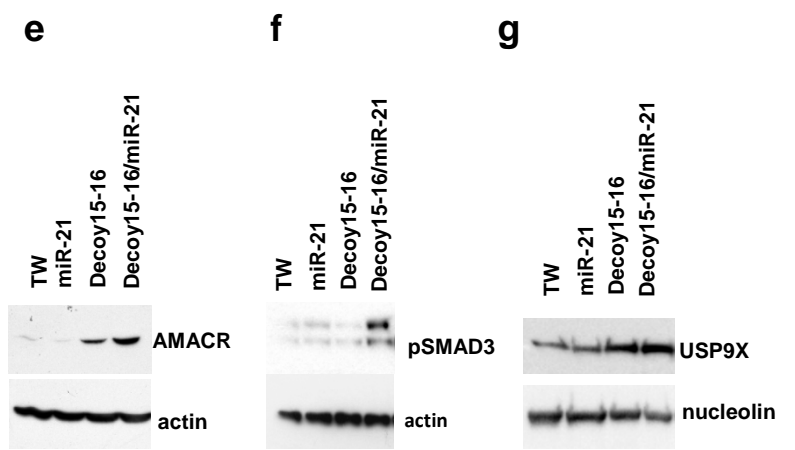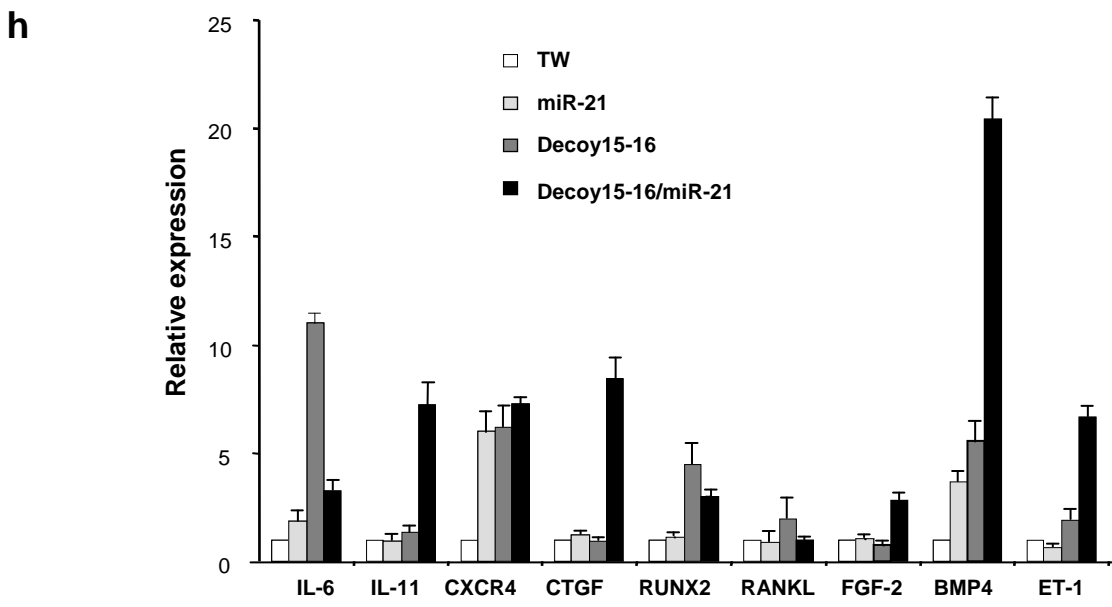

Supplementary Fig. 6

Supplement: onc2015176x8.pdf [file onc2015176x8.pdf]
